Articles of interest in other COB journals

From *Journal of Cell Science*

**Fusion-pore expansion during syncytium formation is restricted by an actin network**

Andrew Chen, Eugenia Leikina, Kamran Melikov, Benjamin Podbilewicz, Michael M. Kozlov and Leonid V. Chernomordik

Chen, A. et al. 2008. *J. Cell Sci.* doi:10.1242/jcs.032169

**p38 mitogen-activated protein kinase regulates canonical Wnt- $\beta$ -catenin signaling by inactivation of GSK3 $\beta$**

Rama Kamesh Bikkavilli, Michael E. Feigin and Craig C. Malbon

Bikkavilli, R. K. et al. 2008. *J. Cell Sci.* doi:10.1242/jcs.032854
